# Supplementary material
Source: Royal Society of Chemistry journal article supplement (doi:10.1039/d6cp00737f)
Supplement: d6cp00737f1.pdf [file d6cp00737f1.pdf]

## Support information

# High Er Doping in CeO<sub>2</sub> via Lanthanide Contraction Boosts Oxygen Vacancy Formation and Ammonia Decomposition

Ji-Zhou Yang<sup>1#</sup>, Zheng Li<sup>1#</sup>, Jun-Kang Guo<sup>1\*</sup>, Chong-Qi Chen<sup>2</sup>, Chun-Jie Yuan, Li-Long Jiang<sup>2</sup>, Shuang-Feng Yin<sup>1,3\*</sup>

<sup>1</sup>College of Chemistry and Chemical Engineering, State Key Laboratory of Chemo and Biosensing, Advanced Catalytic Engineering Research Center of the Ministry of Education, Hunan University, Changsha 410082, P. R. China

<sup>2</sup>National Engineering Research Center of Chemical Fertilizer Catalyst, School of Chemical Engineering, Fuzhou University, Fuzhou 350002, Fujian, P. R. China

<sup>3</sup>College of Chemistry and Chemical Engineering, Central South University of Forestry and Technology, Changsha 410004, P. R. China

#These authors contributed equally to this work.

Corresponding Authors:

Jun-Kang Guo, E-mail: jkguo@hnu.edu.cn;

Shuang-Feng Yin, E-mail: sf\_yin@hnu.edu.cn

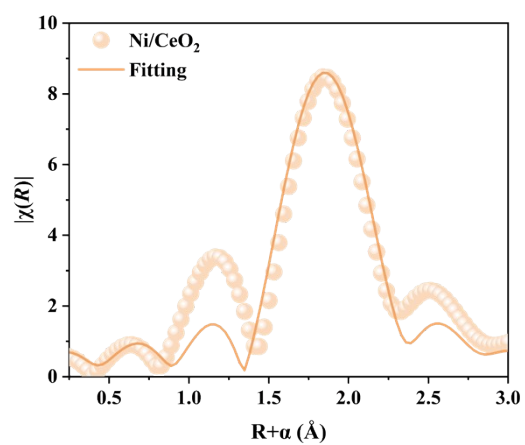

**Figure S1.** Ce-O K-edge XANES spectra of Ni/CeO<sub>2</sub>.

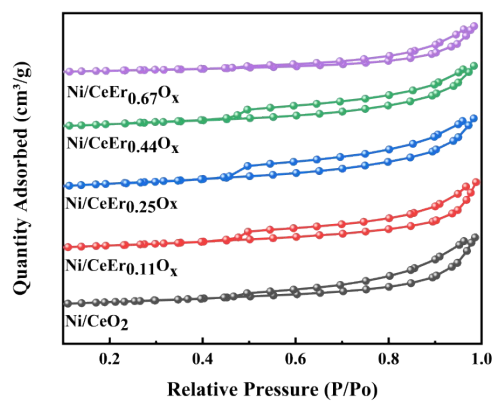

**Figure S2.** N<sub>2</sub> adsorption–desorption isotherms of catalysts with different Er contents.

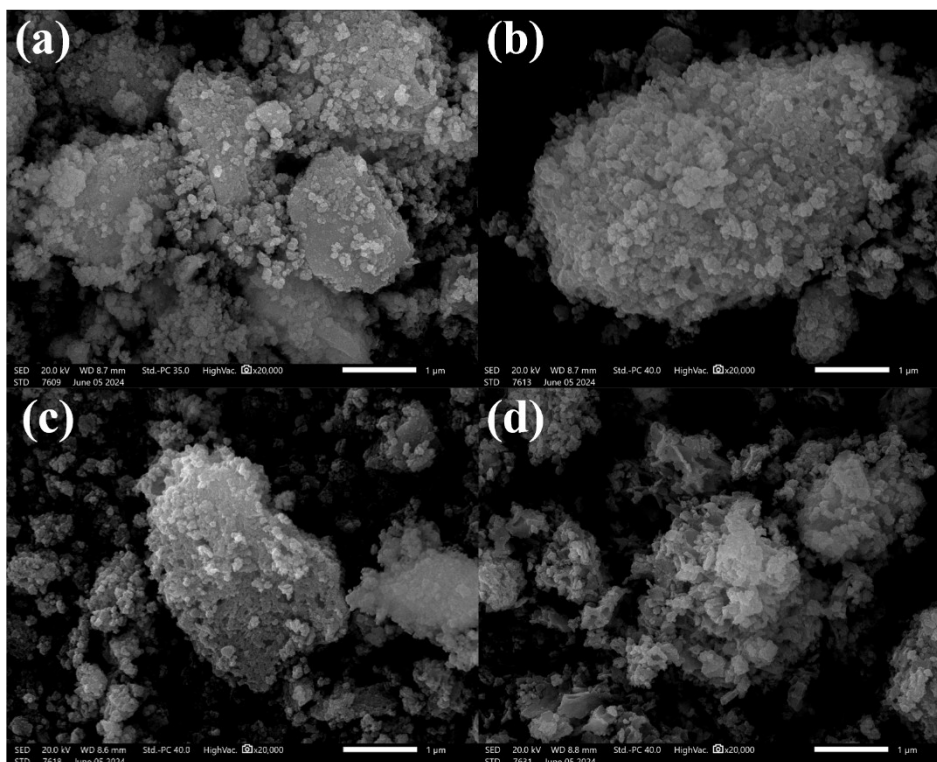

**Figure S3.** SEM images of catalysts with different Er doping levels: (a) Ni/CeO<sub>2</sub>; (b) Ni/CeEr<sub>0.11</sub>O<sub>x</sub>; (c) Ni/CeEr<sub>0.25</sub>O<sub>x</sub>; (d) Ni/CeEr<sub>0.67</sub>O<sub>x</sub>.

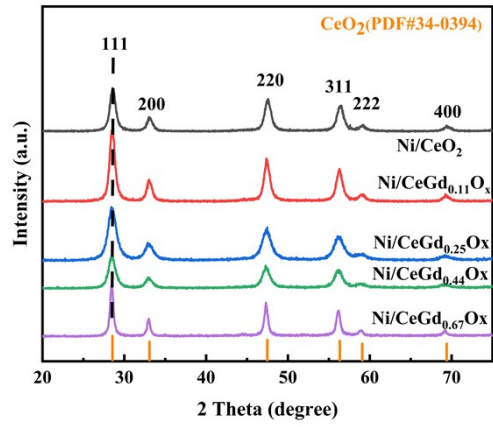

**Figure S4.** XRD spectra of Gd doped CeO<sub>2</sub>.

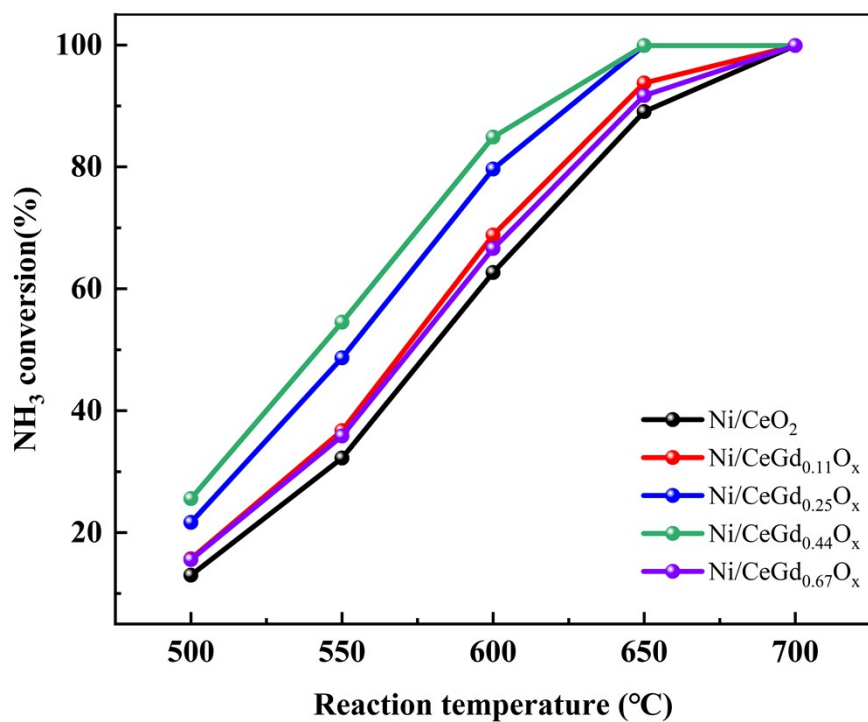

**Figure S5.** Catalytic performance of Ni/CeO<sub>2</sub> and Gd-doped catalysts with different Gd contents;

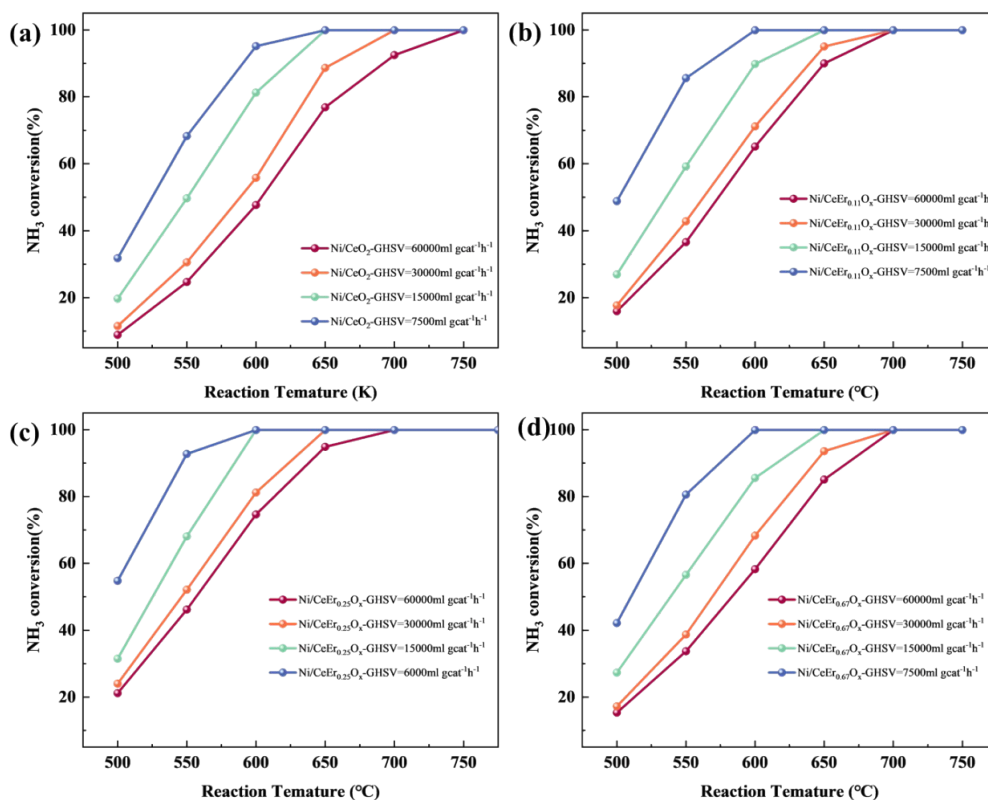

**Figure S6.** Catalytic activity of catalysts with different Er doping levels: (a) Ni/CeO<sub>2</sub>; (b) Ni/CeEr<sub>0.11</sub>O<sub>x</sub>; (c) Ni/CeEr<sub>0.25</sub>O<sub>x</sub>; (d) Ni/CeEr<sub>0.67</sub>O<sub>x</sub>.

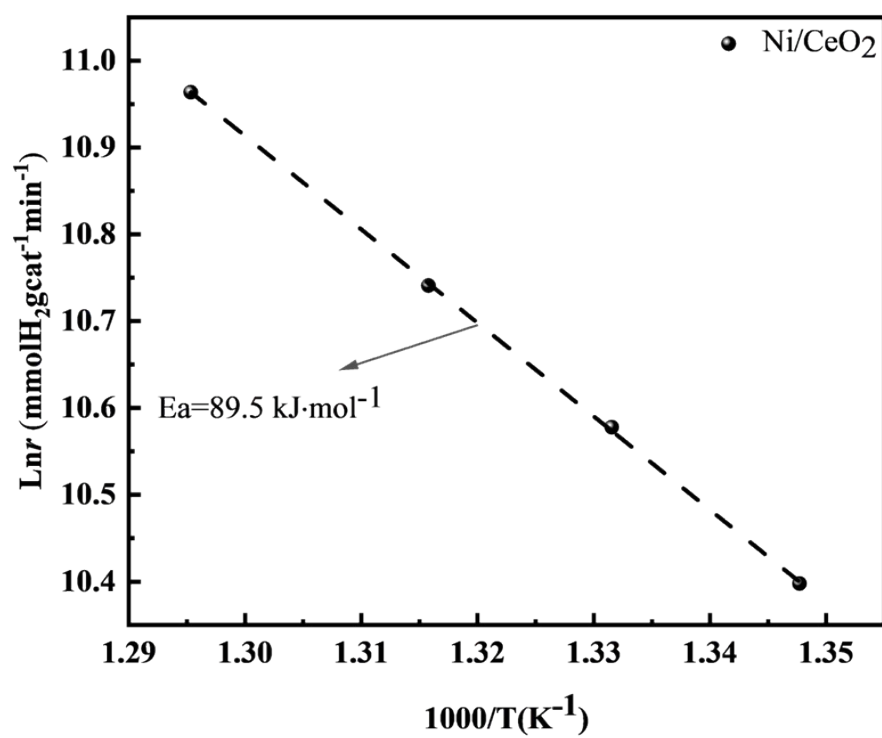

**Figure S7.** Arrhenius plots for apparent activation energy determination of Ni/CeO<sub>2</sub>.

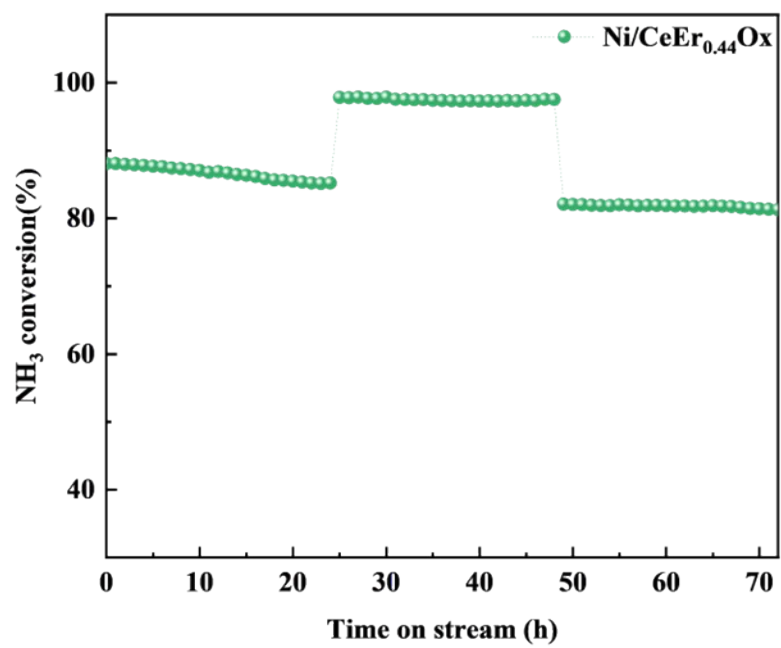

**Figure S8.** Long-term stability test of Ni/CeEr<sub>0.44</sub>O<sub>x</sub>.

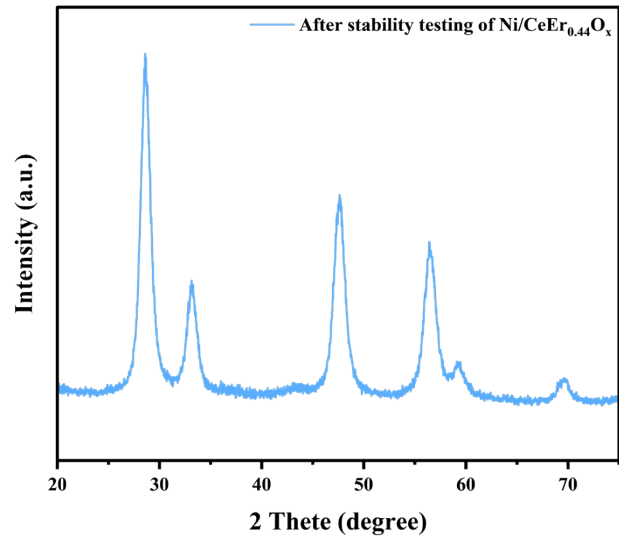

**Figure S9.** Ni/CeEr<sub>0.44</sub>O<sub>x</sub> XRD pattern after stability testing.

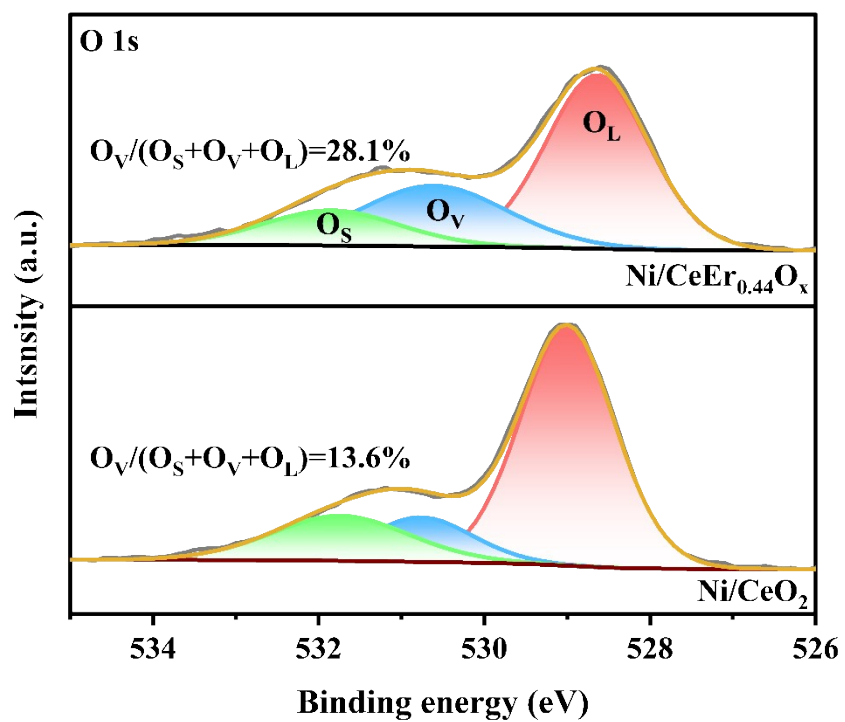

Figure S10. XPS fitting results of O 1s.

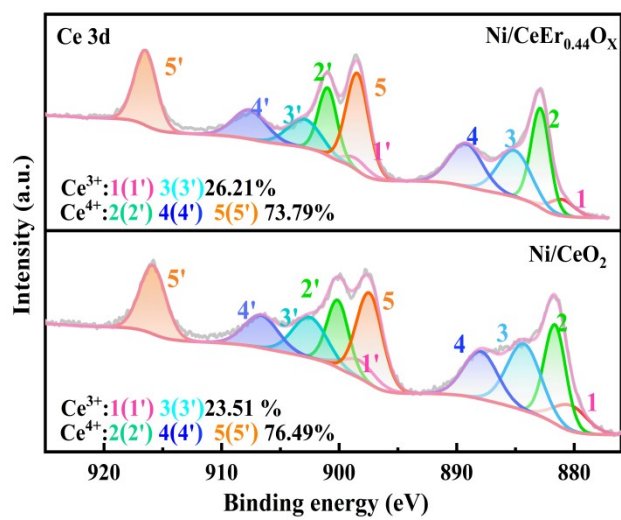

**Figure S11.** XPS fitting results of Ce 3d.

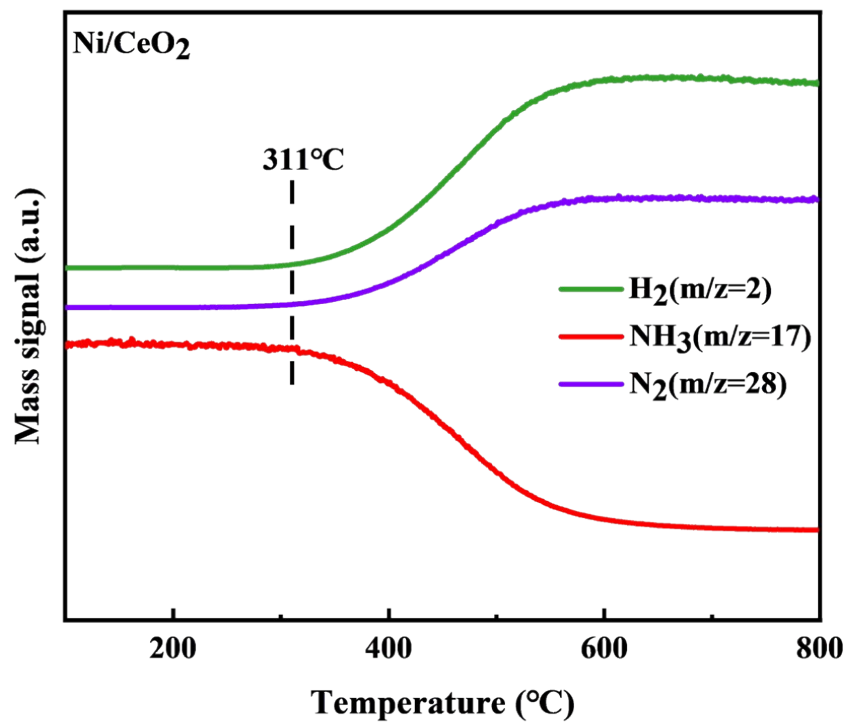

Figure S12. NH<sub>3</sub>-TPSR profile of Ni/CeO<sub>2</sub>.

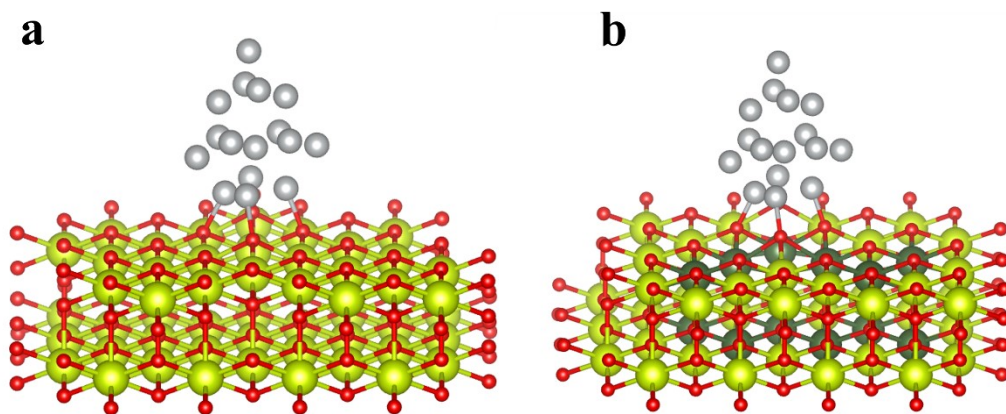

**Figure S13.** Structural models of Ni/CeO<sub>2</sub> and Ni/CeEr<sub>0.44</sub>O<sub>x</sub>.

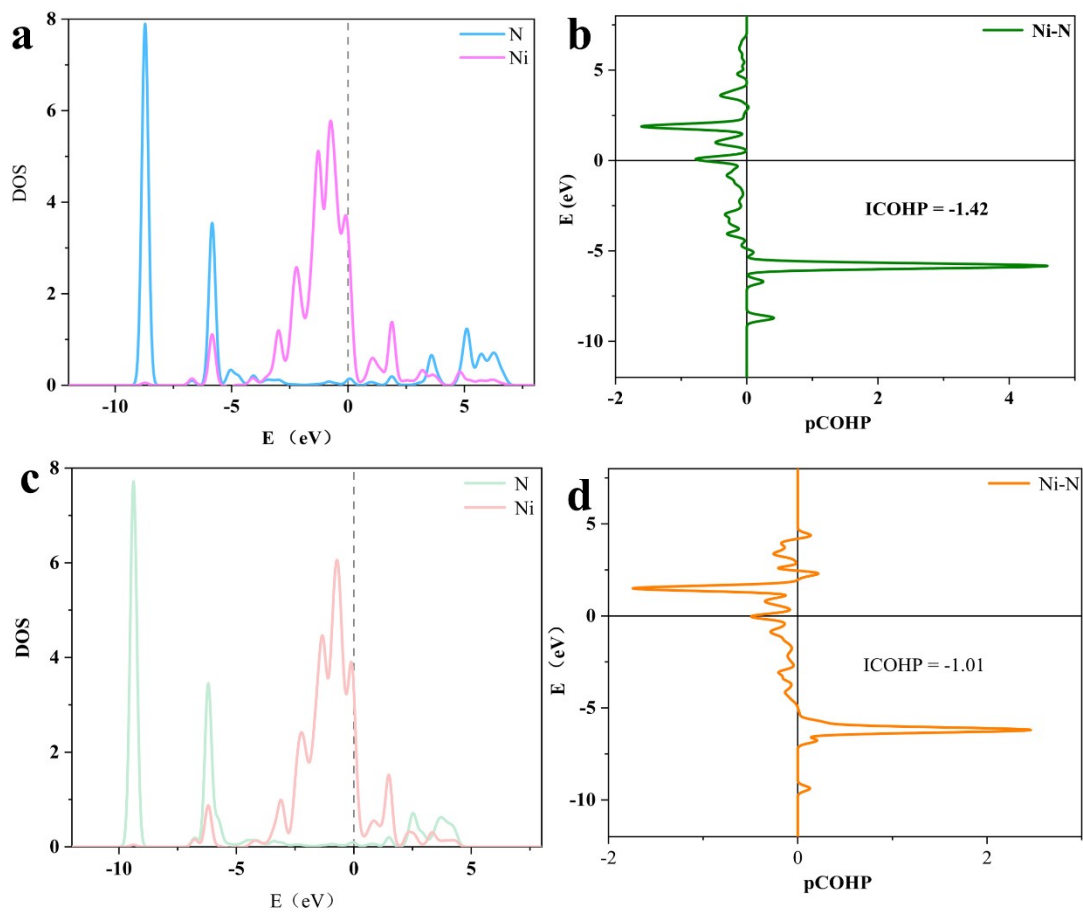

**Figure S14.** (a) DOS of Ni/CeEr<sub>0.44</sub>O<sub>x</sub>; (b) ICOHP of Ni/CeEr<sub>0.44</sub>O<sub>x</sub>; (c) DOS of Ni/CeO<sub>2</sub>; (d) ICOHP of Ni/CeO<sub>2</sub> for the NH<sub>3</sub> adsorption process.

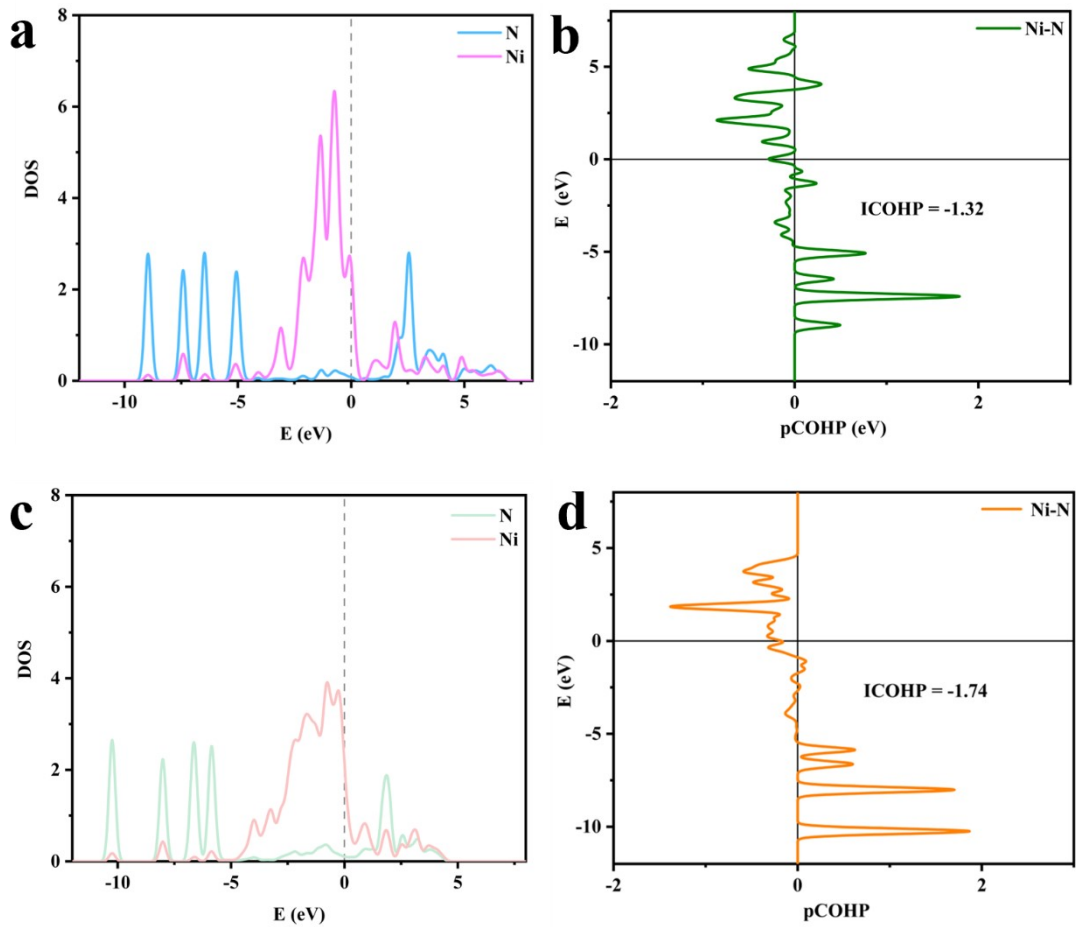

**Figure S15.** (a) DOS of Ni/CeEr<sub>0.44</sub>O<sub>x</sub>; (b) ICOHP of Ni/CeEr<sub>0.44</sub>O<sub>x</sub>; (c) DOS of Ni/CeO<sub>2</sub>; (d) ICOHP of Ni/CeO<sub>2</sub> for the N–N recombination process.

**Table S1.** Physicochemical properties of various catalysts.

| Catalysts                              | Surface area (m <sup>2</sup> ·g <sup>-1</sup> ) <sup>a</sup> | Pore Volume (cm <sup>3</sup> ·g <sup>-1</sup> ) <sup>a</sup> | Pore diameter (nm) <sup>a</sup> | Ce content (wt.%) <sup>b</sup> | Ni content (wt.%) <sup>b</sup> | Ni dispersion (%) <sup>c</sup> | TOF (S <sup>-1</sup> ) |
|----------------------------------------|--------------------------------------------------------------|--------------------------------------------------------------|---------------------------------|--------------------------------|--------------------------------|--------------------------------|------------------------|
| Ni/CeO <sub>2</sub>                    | 22.83                                                        | 0.10                                                         | 3.08                            | 73.66                          | 7.30                           | 3.72                           | 1.05                   |
| Ni/CeEr <sub>0.44</sub> O <sub>x</sub> | 43.53                                                        | 0.14                                                         | 3.13                            | 51.11                          | 5.88                           | 3.33                           | 2.95                   |

a. The textural properties of catalyst were assessed using nitrogen adsorption desorption isothermal measurements. The surface area was determined by the BET equation. Additionally, the pore volume and pore diameter were derived from the BJH adsorption data.

b. The Ni and Ce content of the catalyst was determined based on ICP results.

c. Determined by H<sub>2</sub>-pulse chemisorption experiment.

Table S2. Ce–O coordination parameters derived from Ce K-edge EXAFS data.

| Sample                                 | Shell | CN <sup>a</sup> | R(Å) <sup>b</sup> | $\sigma^2(10^{-3}\text{Å}^2)$ <sup>c</sup> | $\Delta E0(\text{eV})$ | R-factor( $10^{-2}$ ) <sup>d</sup> |
|----------------------------------------|-------|-----------------|-------------------|--------------------------------------------|------------------------|------------------------------------|
| Ni/CeO <sub>2</sub>                    | Ce-O  | 8.0             | 2.31              | 8                                          | 4.69                   | 1.7                                |
| Ni/CeEr <sub>0.44</sub> O <sub>x</sub> | Ce-O  | 6.9             | 2.32              | 4                                          | 5.23                   | 0.8                                |

a. CN = coordination number;

b. R = distance between absorber and backscatter atoms;

c.  $\sigma^2$  = Debye-Waller factor;

d. R-factor indicates the goodness of the fit.
